# Supplementary material for: Integrative analysis of mutational and transcriptional profiles reveals driver mutations of metastatic breast cancers
Source: PubMed Central journal article supplement (PMC5004232; doi:10.1038/celldisc.2016.25), 2016-08-30
Supplement: celldisc201625-s1.pdf [file celldisc201625-s1.pdf]

**Supplementary Figure 1. Comparison of somatic mutations between HRM and LRM patients**

**A** Freq. of somatic mutations

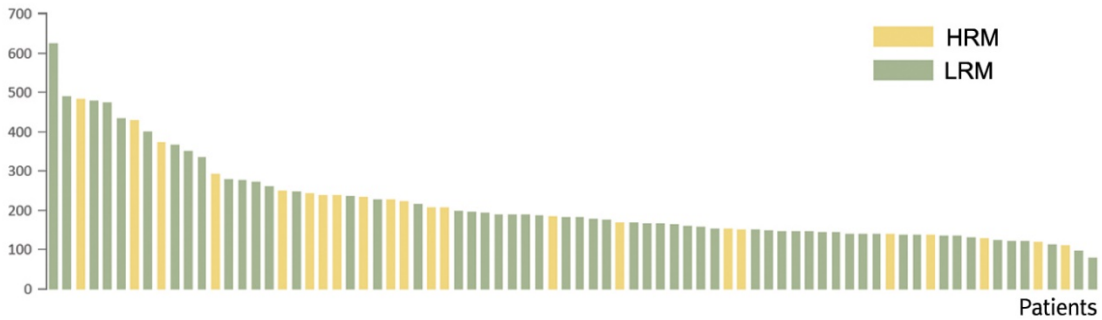

**B**

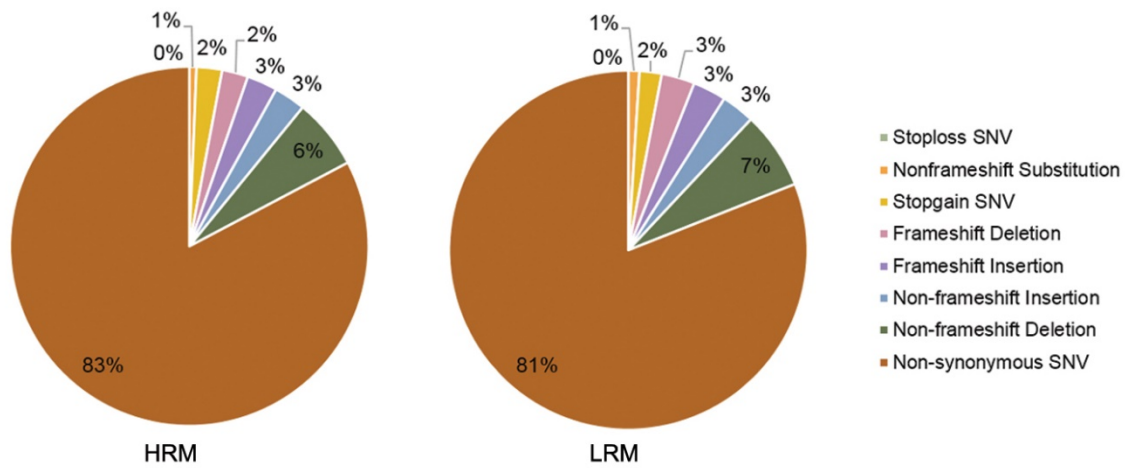

A. The frequencies of somatic mutations in 22 HRM (high-risk for distant metastasis) and 56 LRM (low-risk for distant metastasis) patients (Student t test P value =0.33).

B. Mutation types comparison between two groups.
