# Supplementary material for: Integrative analysis of mutational and transcriptional profiles reveals driver mutations of metastatic breast cancers
Source: PubMed Central journal article supplement (PMC5004232; doi:10.1038/celldisc.2016.25), 2016-08-30

**Supplementary Figure 2. Frequency comparison of cancer-related somatic mutations**

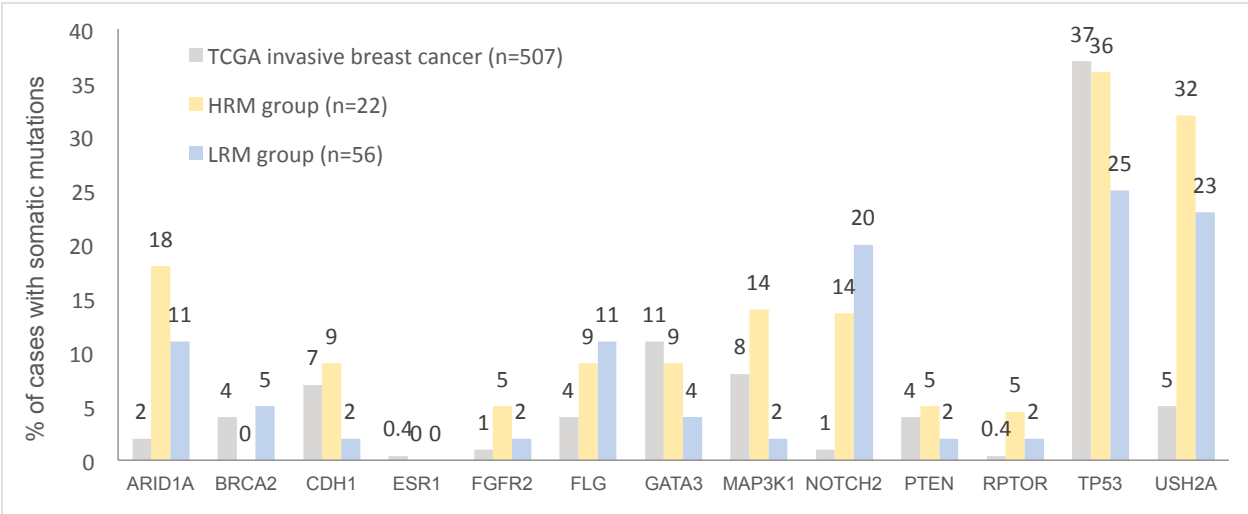

Supplement: celldisc201625-s2.pdf [file celldisc201625-s2.pdf]
