# Supplementary material for: Integrative analysis of mutational and transcriptional profiles reveals driver mutations of metastatic breast cancers
Source: PubMed Central journal article supplement (PMC5004232; doi:10.1038/celldisc.2016.25), 2016-08-30

Supplementary Figure 4. Wound healing assay results of nine mutations

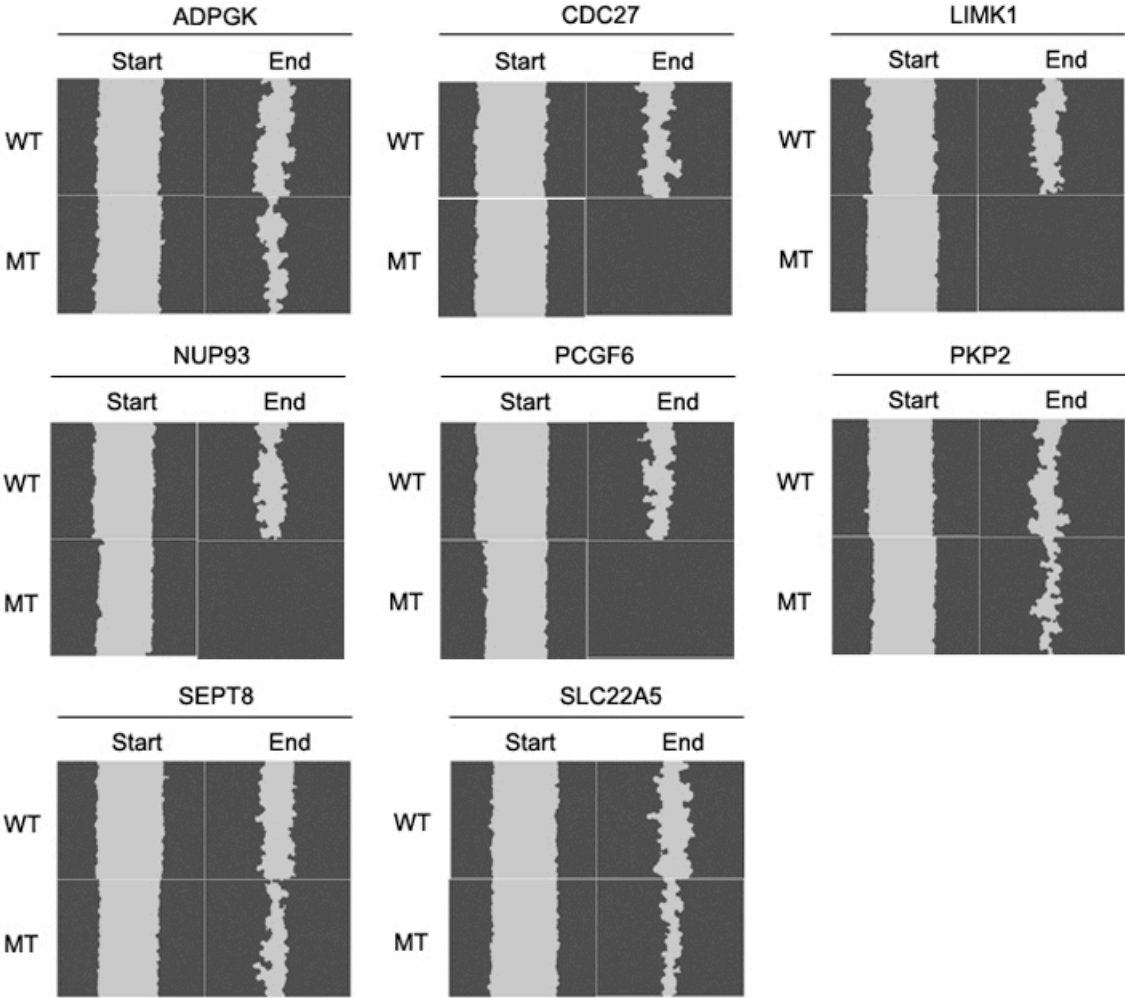

Supplement: celldisc201625-s4.pdf [file celldisc201625-s4.pdf]
