# Supplementary material for: Integrative analysis of mutational and transcriptional profiles reveals driver mutations of metastatic breast cancers
Source: PubMed Central journal article supplement (PMC5004232; doi:10.1038/celldisc.2016.25), 2016-08-30

## Supplementary Figure 5. Predicted signaling pathways altered by five driver mutations

The shortest pathways linking mutations to all associated TFs.

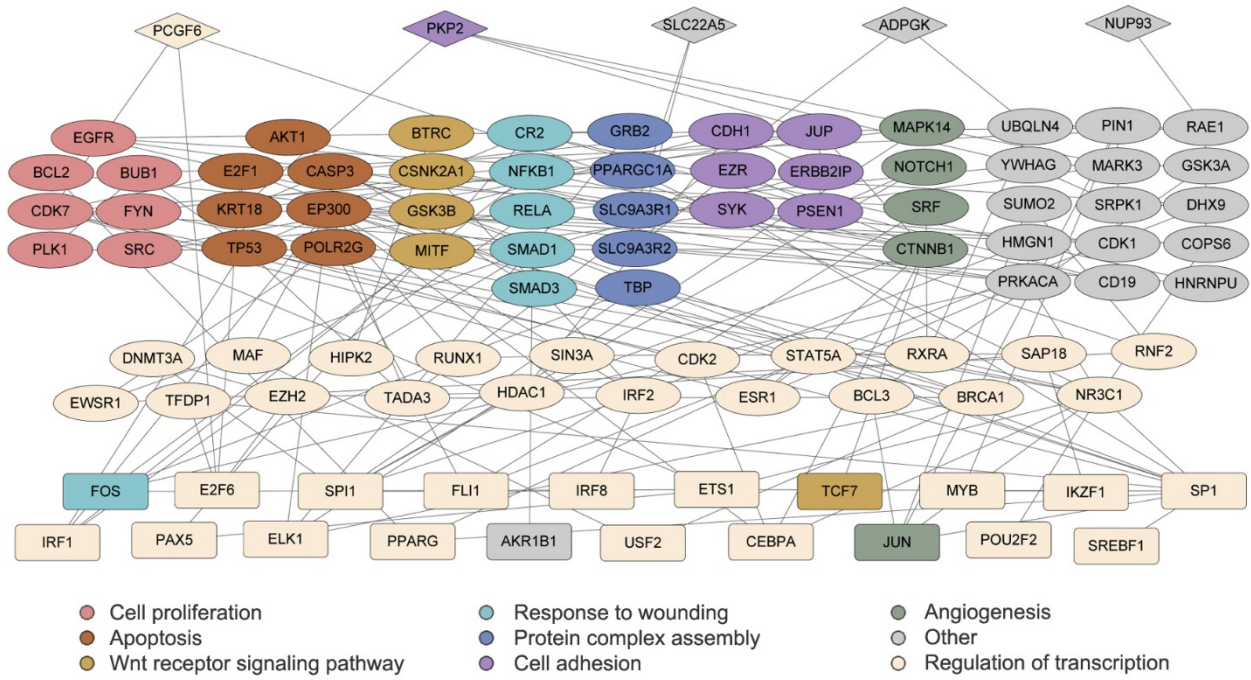

Supplement: celldisc201625-s5.pdf [file celldisc201625-s5.pdf]
