# Supplementary material for: Integrative analysis of mutational and transcriptional profiles reveals driver mutations of metastatic breast cancers
Source: PubMed Central journal article supplement (PMC5004232; doi:10.1038/celldisc.2016.25), 2016-08-30
Supplement: celldisc201625-s6.pdf [file celldisc201625-s6.pdf]

## Supplementary Table 1. Patient information

\* POS: Positive, NEG: Negative, UN: Unknown

| Class | Sample Number | ER | PR | HER2 | Molecular Subtype | Age | T Stage | Histological Grade | p53 | Bcl-2 | Ki-67 | Hormonal Treatment |
|-------|---------------|----|----|------|-------------------|-----|---------|--------------------|-----|-------|-------|--------------------|
| HRM   | 2008-134      | 0  | 0  | 0    | TNBC              | 67  | UN      | UN                 | UN  | UN    | UN    | UN                 |
| HRM   | 2006-72       | 0  | 0  | 0    | TNBC              | 39  | UN      | UN                 | UN  | UN    | UN    | UN                 |
| HRM   | 2006-56       | 0  | 0  | 0    | TNBC              | 62  | UN      | UN                 | UN  | UN    | UN    | UN                 |
| HRM   | 2003-256      | 0  | 0  | 0    | TNBC              | 55  | 2       | IIB                | POS | NEG   | POS   | 0                  |
| HRM   | 2003-265      | 0  | 0  | 0    | Non-luminal       | 40  | UN      | UN                 | UN  | UN    | UN    | UN                 |
| HRM   | 2003-159      | 0  | 0  | 0    | TNBC              | 43  | 2       | IIB                | NEG | POS   | POS   | 0                  |
| HRM   | 2003-186      | 0  | 0  | 0    | TNBC              | 51  | 2       | IIIC               | NEG | NEG   | POS   | 0                  |
| HRM   | 2006-223      | 1  | 1  | 1    | Luminal           | 62  | 2       | IIA                | NEG | POS   | POS   | 1                  |
| HRM   | 2006-235      | 1  | 1  | 0    | Luminal           | 36  | 2       | IIA                | POS | POS   | POS   | 1                  |
| HRM   | 2006-267      | 1  | 0  | 1    | Luminal           | 60  | 2       | IIA                | POS | POS   | POS   | 1                  |
| HRM   | 2006-49       | 1  | 1  | 0    | Luminal           | 37  | 2       | IIA                | NEG | POS   | POS   | 1                  |
| HRM   | 2008-56       | 0  | 0  | 1    | HER2              | 72  | UN      | UN                 | UN  | UN    | UN    | UN                 |
| HRM   | 2012          | 1  | 1  | UN   | Luminal           | 37  | 1c      | IIA                | POS | POS   | POS   | 1                  |
| HRM   | D2129         | 0  | 0  | 0    | TNBC              | 32  | 3       | IIIA               | POS | NEG   | UN    | 0                  |
| HRM   | 2186          | 1  | 1  | 0    | Luminal           | 63  | 2       | IIB                | POS | NEG   | POS   | 1                  |
| HRM   | D2332         | 0  | 1  | 0    | Luminal           | 56  | 1c      | I                  | POS | POS   | POS   | 1                  |
| HRM   | D2370         | 1  | 1  | 0    | Luminal           | 37  | 2       | IIB                | NEG | NEG   | POS   | 1                  |
| HRM   | 9827          | 1  | 0  | 0    | Luminal           | 51  | UN      | UN                 | UN  | UN    | UN    | UN                 |
| HRM   | 99143         | 1  | 1  | 0    | Luminal           | 63  | UN      | UN                 | UN  | UN    | UN    | UN                 |
| HRM   | 99150         | 1  | 1  | 0    | Luminal           | 51  | UN      | UN                 | UN  | UN    | UN    | UN                 |
| HRM   | 9970          | 0  | 0  | 0    | Non-luminal       | 58  | UN      | UN                 | UN  | UN    | UN    | UN                 |
| HRM   | 9984          | 0  | 0  | 0    | Non-luminal       | 55  | UN      | UN                 | UN  | UN    | UN    | UN                 |
| LRM   | D2006-84      | 0  | 0  | 0    | TNBC              | 40  | 3       | IIB                | POS | POS   | POS   | 0                  |
| LRM   | 2003-303      | 0  | 0  | UN   | Non-luminal       | 43  | 1c      | IIA                | POS | POS   | POS   | 0                  |
| LRM   | 2107          | 1  | 1  | 0    | Luminal           | 54  | 2       | IIA                | POS | NEG   | UN    | 1                  |
| LRM   | D2096         | 0  | 0  | 0    | TNBC              | 58  | 1c      | UN                 | NEG | NEG   | POS   | 0                  |
| LRM   | 2083          | 1  | 1  | 1    | Luminal           | 65  | 1c      | I                  | POS | POS   | POS   | 1                  |
| LRM   | 2062          | 1  | 1  | 1    | Luminal           | 51  | 2       | IIB                | POS | POS   | POS   | 1                  |
| LRM   | 2051          | 0  | 0  | 0    | TNBC              | 45  | 1c      | I                  | NEG | NEG   | POS   | 0                  |
| LRM   | 2060          | 0  | 1  | 0    | Luminal           | 51  | 2       | IIB                | UN  | UN    | UN    | 1                  |
| LRM   | 2150          | 0  | 0  | UN   | Non-luminal       | 45  | 2       | IIA                | NEG | POS   | POS   | 0                  |
| LRM   | 2146          | 0  | 0  | 1    | HER2              | 69  | 2       | IIA                | UN  | UN    | UN    | 0                  |
| LRM   | 2142          | 0  | 0  | 0    | TNBC              | 43  | 2       | IIA                | POS | NEG   | POS   | 0                  |
| LRM   | 2172          | 0  | 0  | 0    | TNBC              | 37  | 2       | IIB                | POS | NEG   | POS   | 1                  |
| LRM   | D2224         | 1  | 1  | 0    | Luminal           | 51  | 1b      | I                  | POS | NEG   | POS   | 1                  |
| LRM   | 2222          | 1  | UN | UN   | Luminal           | 51  | 2       | IIA                | POS | POS   | POS   | 1                  |
| LRM   | 2214          | 1  | 1  | 0    | Luminal           | 54  | 1c      | I                  | POS | NEG   | POS   | 1                  |
| LRM   | 2234          | 1  | 0  | 0    | Luminal           | 39  | 2       | IIA                | NEG | NEG   | POS   | 1                  |
| LRM   | 2189          | 0  | 0  | 0    | TNBC              | 52  | 1c      | I                  | NEG | POS   | POS   | 0                  |
| LRM   | 2188          | 1  | 0  | 0    | Luminal           | 38  | 1b      | I                  | POS | POS   | POS   | 1                  |
| LRM   | 2195          | 1  | 0  | 0    | Luminal           | 53  | 1c      | IIA                | NEG | NEG   | POS   | 1                  |
| LRM   | D2268         | 0  | 0  | 0    | TNBC              | 34  | 1c      | I                  | POS | POS   | POS   | 0                  |
| LRM   | 2243          | 1  | 1  | UN   | Luminal           | 41  | 2       | IIA                | POS | NEG   | POS   | 1                  |
| LRM   | D2303         | 0  | 0  | 0    | TNBC              | 52  | 2       | IIA                | NEG | POS   | POS   | 0                  |
| LRM   | 2242-2        | 1  | 1  | 0    | Luminal           | 56  | 1c      | UN                 | NEG | NEG   | POS   | 1                  |
| LRM   | 2183          | 1  | 1  | 0    | Luminal           | 39  | 2       | IIB                | POS | NEG   | POS   | 1                  |
| LRM   | 2202          | 0  | 0  | 1    | HER2              | 37  | 2       | IIA                | NEG | NEG   | POS   | 0                  |
| LRM   | 2198          | 0  | 0  | 1    | HER2              | 36  | 2       | IIB                | POS | NEG   | POS   | 0                  |
| LRM   | 2194          | 1  | 0  | 0    | Luminal           | 56  | 2       | IIB                | POS | POS   | POS   | 1                  |

|     |           |   |   |    |             |    |    |      |     |     |     |    |
|-----|-----------|---|---|----|-------------|----|----|------|-----|-----|-----|----|
| LRM | 2304      | 1 | 1 | 0  | Luminal     | 39 | 2  | IIB  | NEG | POS | POS | 1  |
| LRM | D2247     | 0 | 0 | UN | Non-luminal | 53 | 2  | IIB  | POS | POS | POS | 0  |
| LRM | 2281      | 1 | 1 | UN | Luminal     | 40 | 2  | IIA  | NEG | NEG | POS | 1  |
| LRM | 2317      | 1 | 1 | 0  | Luminal     | 39 | 2  | IIB  | POS | POS | POS | 1  |
| LRM | 2358      | 1 | 1 | 0  | Luminal     | 63 | 2  | IIA  | NEG | NEG | POS | 1  |
| LRM | 2357      | 0 | 0 | UN | Non-luminal | 39 | 2  | IIIA | POS | POS | POS | 0  |
| LRM | 2359      | 0 | 0 | 0  | TNBC        | 45 | 2  | IIA  | POS | NEG | POS | 0  |
| LRM | 2379      | 0 | 0 | 1  | HER2        | 36 | 2  | IIA  | NEG | NEG | POS | 0  |
| LRM | 2378      | 0 | 0 | 0  | TNBC        | 41 | 1c | IIA  | POS | NEG | POS | 0  |
| LRM | 2006-315  | 0 | 0 | 0  | TNBC        | 69 | 1c | IIA  | POS | POS | POS | 0  |
| LRM | 2006-313  | 0 | 0 | 1  | HER2        | 63 | 2  | IIA  | POS | NEG | POS | 0  |
| LRM | 2006-187  | 0 | 0 | 0  | TNBC        | 53 | 1c | IIA  | POS | POS | POS | 0  |
| LRM | 2003-237  | 1 | 1 | 0  | Luminal     | 61 | 2  | IIIA | POS | POS | POS | 1  |
| LRM | 2006-174  | 0 | 0 | 0  | TNBC        | 42 | 2  | IIIA | POS | POS | POS | 1  |
| LRM | 2006-225  | 0 | 1 | 0  | Luminal     | 51 | 2  | IIA  | POS | NEG | POS | 1  |
| LRM | 2006-241  | 0 | 1 | 0  | Luminal     | 52 | 2  | IIB  | POS | NEG | POS | 1  |
| LRM | 2006-149  | 1 | 1 | 0  | Luminal     | 73 | 2  | IIB  | POS | POS | POS | 1  |
| LRM | 2006-316  | 0 | 0 | 0  | TNBC        | 30 | 1c | I    | POS | POS | POS | 0  |
| LRM | 2006-16   | 1 | 1 | 0  | Luminal     | 38 | 2  | IIIA | POS | POS | POS | 1  |
| LRM | 2006-173  | 0 | 0 | UN | Non-luminal | 58 | 2  | IIA  | POS | POS | POS | 0  |
| LRM | 2006-38   | 1 | 1 | UN | Luminal     | 64 | 2  | IIB  | POS | NEG | POS | 1  |
| LRM | 2006-21   | 0 | 0 | 0  | TNBC        | 71 | 2  | IIIA | POS | NEG | POS | 0  |
| LRM | 2006-82   | 1 | 1 | 0  | Luminal     | 43 | 2  | IIIA | NEG | POS | POS | 1  |
| LRM | D2008-10  | 0 | 0 | 0  | TNBC        | 55 | 2  | UN   | NEG | NEG | POS | 0  |
| LRM | D2008-118 | 1 | 0 | 0  | Luminal     | 39 | 3  | IIIA | POS | POS | POS | 1  |
| LRM | D2008-112 | 0 | 0 | 0  | TNBC        | 35 | 2  | IIB  | POS | NEG | POS | 0  |
| LRM | 9829      | 0 | 0 | 0  | TNBC        | 59 | UN | UN   | UN  | UN  | UN  | UN |
| LRM | 9964      | 0 | 0 | 0  | Non-luminal | 46 | UN | UN   | UN  | UN  | UN  | UN |
| LRM | 9653      | 1 | 0 | UN | Luminal     | 53 | UN | UN   | UN  | UN  | UN  | UN |
