# Supplementary material for: Integrative analysis of mutational and transcriptional profiles reveals driver mutations of metastatic breast cancers
Source: PubMed Central journal article supplement (PMC5004232; doi:10.1038/celldisc.2016.25), 2016-08-30
Supplement: celldisc201625-s7.pdf [file celldisc201625-s7.pdf]

Supplementary Table 2. Exome Stats

| Group    | Data_Sample | CapKit | Total_reads | Total_yield | Average_read_length |
|----------|-------------|--------|-------------|-------------|---------------------|
| Meta     | 2003-159    | TruSeq | 71806624    | 7252469024  | 101                 |
| Meta     | 2003-186    | TruSeq | 71431568    | 7214588368  | 101                 |
| Meta     | 2003-256    | TruSeq | 67746608    | 6842407408  | 101                 |
| Meta     | 2003-265    | TruSeq | 107289452   | 10836234652 | 101                 |
| Meta     | 2006-223    | TruSeq | 124465416   | 12571007016 | 101                 |
| Meta     | 2006-235    | TruSeq | 42917684    | 4334686084  | 101                 |
| Meta     | 2006-267    | TruSeq | 72791540    | 7351945540  | 101                 |
| Meta     | 2006-49     | TruSeq | 63355022    | 6398857222  | 101                 |
| Meta     | 2006-56     | TruSeq | 120148366   | 12134984966 | 101                 |
| Meta     | 2006-72     | TruSeq | 95110724    | 9606183124  | 101                 |
| Meta     | 2008-134    | TruSeq | 121307940   | 12252101940 | 101                 |
| Meta     | 2008-56     | TruSeq | 139524402   | 14091964602 | 101                 |
| Meta     | 2012        | TruSeq | 67694974    | 6837192374  | 101                 |
| Meta     | 2186        | TruSeq | 75429684    | 7618398084  | 101                 |
| Meta     | 9827        | TruSeq | 96312624    | 9727575024  | 101                 |
| Meta     | 99143       | TruSeq | 95297328    | 9625030128  | 101                 |
| Meta     | 99150       | TruSeq | 89868026    | 9076670626  | 101                 |
| Meta     | 9970        | TruSeq | 104601038   | 10564704838 | 101                 |
| Meta     | 9984        | TruSeq | 84835320    | 8568367320  | 101                 |
| Meta     | D2129       | TruSeq | 71411018    | 7212512818  | 101                 |
| Meta     | D2332       | TruSeq | 149217302   | 15070947502 | 101                 |
| Meta     | D2370       | TruSeq | 68005646    | 6868570246  | 101                 |
| Non-Meta | 2003-237    | TruSeq | 66747184    | 6741465584  | 101                 |
| Non-Meta | 2003-303    | TruSeq | 274294734   | 27703768134 | 101                 |
| Non-Meta | 2006-149    | TruSeq | 71203584    | 7191561984  | 101                 |
| Non-Meta | 2006-16     | TruSeq | 63959354    | 6459894754  | 101                 |
| Non-Meta | 2006-173    | TruSeq | 65060364    | 6571096764  | 101                 |
| Non-Meta | 2006-174    | TruSeq | 75272122    | 7602484322  | 101                 |
| Non-Meta | 2006-187    | TruSeq | 66586432    | 6725229632  | 101                 |
| Non-Meta | 2006-21     | TruSeq | 66671754    | 6733847154  | 101                 |
| Non-Meta | 2006-225    | TruSeq | 142889558   | 14431845358 | 101                 |
| Non-Meta | 2006-241    | TruSeq | 66686306    | 6735316906  | 101                 |
| Non-Meta | 2006-313    | TruSeq | 118802790   | 11999081790 | 101                 |
| Non-Meta | 2006-315    | TruSeq | 92977146    | 9390691746  | 101                 |
| Non-Meta | 2006-316    | TruSeq | 86935254    | 8780460654  | 101                 |
| Non-Meta | 2006-38     | TruSeq | 62203378    | 6282541178  | 101                 |
| Non-Meta | 2006-82     | TruSeq | 65404370    | 6605841370  | 101                 |
| Non-Meta | 2051        | TruSeq | 63903874    | 6454291274  | 101                 |
| Non-Meta | 2060        | TruSeq | 74434504    | 7517884904  | 101                 |
| Non-Meta | 2062        | TruSeq | 60625852    | 6123211052  | 101                 |
| Non-Meta | 2083        | TruSeq | 63221230    | 6385344230  | 101                 |
| Non-Meta | 2107        | TruSeq | 65908270    | 6656735270  | 101                 |
| Non-Meta | 2142        | TruSeq | 68623874    | 6931011274  | 101                 |
| Non-Meta | 2146        | TruSeq | 70653476    | 7136001076  | 101                 |

|          |           |        |           |             |     |
|----------|-----------|--------|-----------|-------------|-----|
| Non-Meta | 2150      | TruSeq | 65283598  | 6593643398  | 101 |
| Non-Meta | 2172      | TruSeq | 115135026 | 11628637626 | 101 |
| Non-Meta | 2183      | TruSeq | 95016516  | 9596668116  | 101 |
| Non-Meta | 2188      | TruSeq | 68920978  | 6961018778  | 101 |
| Non-Meta | 2189      | TruSeq | 72205654  | 7292771054  | 101 |
| Non-Meta | 2194      | TruSeq | 68658006  | 6934458606  | 101 |
| Non-Meta | 2195      | TruSeq | 97252636  | 9822516236  | 101 |
| Non-Meta | 2198      | TruSeq | 71723840  | 7244107840  | 101 |
| Non-Meta | 2202      | TruSeq | 69433814  | 7012815214  | 101 |
| Non-Meta | 2214      | TruSeq | 248051486 | 25053200086 | 101 |
| Non-Meta | 2222      | TruSeq | 61514562  | 6212970762  | 101 |
| Non-Meta | 2234      | TruSeq | 63535838  | 6417119638  | 101 |
| Non-Meta | 2242-2    | TruSeq | 76047250  | 7680772250  | 101 |
| Non-Meta | 2243      | TruSeq | 67180240  | 6785204240  | 101 |
| Non-Meta | 2281      | TruSeq | 61334316  | 6194765916  | 101 |
| Non-Meta | 2304      | TruSeq | 67641824  | 6831824224  | 101 |
| Non-Meta | 2317      | TruSeq | 72207034  | 7292910434  | 101 |
| Non-Meta | 2357      | TruSeq | 69014828  | 6970497628  | 101 |
| Non-Meta | 2358      | TruSeq | 60245342  | 6084779542  | 101 |
| Non-Meta | 2359      | TruSeq | 67930688  | 6860999488  | 101 |
| Non-Meta | 2378      | TruSeq | 66850376  | 6751887976  | 101 |
| Non-Meta | 2379      | TruSeq | 78776448  | 7956421248  | 101 |
| Non-Meta | 9653      | TruSeq | 100237252 | 10123962452 | 101 |
| Non-Meta | 9829      | TruSeq | 102951148 | 10398065948 | 101 |
| Non-Meta | 9964      | TruSeq | 107980818 | 10906062618 | 101 |
| Non-Meta | D2006-84  | TruSeq | 109043482 | 11013391682 | 101 |
| Non-Meta | D2008-10  | TruSeq | 65332634  | 6598596034  | 101 |
| Non-Meta | D2008-112 | TruSeq | 62429146  | 6305343746  | 101 |
| Non-Meta | D2008-118 | TruSeq | 69083774  | 6977461174  | 101 |
| Non-Meta | D2096     | TruSeq | 102940120 | 10396952120 | 101 |
| Non-Meta | D2224     | TruSeq | 103143650 | 10417508650 | 101 |
| Non-Meta | D2247     | TruSeq | 69672480  | 7036920480  | 101 |
| Non-Meta | D2268     | TruSeq | 66455362  | 6711991562  | 101 |
| Non-Meta | D2303     | TruSeq | 82447696  | 8327217296  | 101 |

| Target_regions | Average_throughput_dept<br>h_of_target_regions | Initial_mappable_reads_map<br>ped_to_human_genome |
|----------------|------------------------------------------------|---------------------------------------------------|
| 62085286       | 117                                            | 71806624                                          |
| 62085286       | 116                                            | 71431568                                          |
| 62085286       | 110                                            | 67746608                                          |
| 62085286       | 175                                            | 107147652                                         |
| 62085286       | 203                                            | 124465416                                         |
| 62085286       | 70                                             | 42917684                                          |
| 62085286       | 118                                            | 72791540                                          |
| 62085286       | 103                                            | 63355022                                          |
| 62085286       | 196                                            | 119946126                                         |
| 62085286       | 155                                            | 94936864                                          |
| 62085286       | 197                                            | 121133716                                         |
| 62085286       | 227                                            | 139310920                                         |
| 62085286       | 110                                            | 67694974                                          |
| 62085286       | 123                                            | 75429684                                          |
| 62085286       | 157                                            | 96152000                                          |
| 62085286       | 155                                            | 95176234                                          |
| 62085286       | 146                                            | 89727332                                          |
| 62085286       | 170                                            | 104365584                                         |
| 62085286       | 138                                            | 84728156                                          |
| 62085286       | 116                                            | 71411018                                          |
| 62085286       | 243                                            | 149217302                                         |
| 62085286       | 111                                            | 68005646                                          |
| 62085286       | 109                                            | 66747184                                          |
| 62085286       | 446                                            | 273613768                                         |
| 62085286       | 116                                            | 71203584                                          |
| 62085286       | 104                                            | 63959354                                          |
| 62085286       | 106                                            | 65060364                                          |
| 62085286       | 123                                            | 75272122                                          |
| 62085286       | 108                                            | 66586432                                          |
| 62085286       | 109                                            | 66671754                                          |
| 62085286       | 233                                            | 142889558                                         |
| 62085286       | 109                                            | 66686306                                          |
| 62085286       | 193                                            | 118802790                                         |
| 62085286       | 151                                            | 92977146                                          |
| 62085286       | 141                                            | 86935254                                          |
| 62085286       | 101                                            | 62203378                                          |
| 62085286       | 106                                            | 65404370                                          |
| 62085286       | 104                                            | 63903874                                          |
| 62085286       | 121                                            | 74434504                                          |
| 62085286       | 99                                             | 60625852                                          |
| 62085286       | 103                                            | 63221230                                          |
| 62085286       | 107                                            | 65908270                                          |
| 62085286       | 112                                            | 68623874                                          |
| 62085286       | 115                                            | 70653476                                          |

|          |     |           |
|----------|-----|-----------|
| 62085286 | 106 | 65283598  |
| 62085286 | 187 | 115135026 |
| 62085286 | 155 | 95016516  |
| 62085286 | 112 | 68920978  |
| 62085286 | 118 | 72205654  |
| 62085286 | 112 | 68658006  |
| 62085286 | 158 | 97252636  |
| 62085286 | 117 | 71723840  |
| 62085286 | 113 | 69433814  |
| 62085286 | 404 | 242636962 |
| 62085286 | 100 | 61514562  |
| 62085286 | 103 | 63535838  |
| 62085286 | 124 | 76047250  |
| 62085286 | 109 | 67180240  |
| 62085286 | 100 | 61334316  |
| 62085286 | 110 | 67641824  |
| 62085286 | 118 | 72207034  |
| 62085286 | 112 | 69014828  |
| 62085286 | 98  | 60245342  |
| 62085286 | 111 | 67930688  |
| 62085286 | 109 | 66850376  |
| 62085286 | 128 | 78776448  |
| 62085286 | 163 | 100022238 |
| 62085286 | 168 | 102781852 |
| 62085286 | 176 | 107810456 |
| 62085286 | 177 | 109043482 |
| 62085286 | 106 | 65332634  |
| 62085286 | 102 | 62429146  |
| 62085286 | 112 | 69083774  |
| 62085286 | 168 | 102940120 |
| 62085286 | 168 | 102981652 |
| 62085286 | 113 | 69672480  |
| 62085286 | 108 | 66455362  |
| 62085286 | 134 | 82447696  |

| Initial_mappable_reads_out_of_total_reads | Non_redundant_reads_deduplicated_by_Picard_tools | Non_redundant_reads_out_of_initial_mappable_reads |
|-------------------------------------------|--------------------------------------------------|---------------------------------------------------|
| 100.00%                                   | 58967621                                         | 82.10%                                            |
| 100.00%                                   | 57896280                                         | 81.10%                                            |
| 100.00%                                   | 55321621                                         | 81.70%                                            |
| 99.90%                                    | 71362504                                         | 66.60%                                            |
| 100.00%                                   | 104784962                                        | 84.20%                                            |
| 100.00%                                   | 41104537                                         | 95.80%                                            |
| 100.00%                                   | 61777104                                         | 84.90%                                            |
| 100.00%                                   | 53116170                                         | 83.80%                                            |
| 99.80%                                    | 86354030                                         | 72.00%                                            |
| 99.80%                                    | 59198076                                         | 62.40%                                            |
| 99.90%                                    | 86234730                                         | 71.20%                                            |
| 99.80%                                    | 82611050                                         | 59.30%                                            |
| 100.00%                                   | 53571890                                         | 79.10%                                            |
| 100.00%                                   | 57253340                                         | 75.90%                                            |
| 99.80%                                    | 51841255                                         | 53.90%                                            |
| 99.90%                                    | 55806455                                         | 58.60%                                            |
| 99.80%                                    | 54705247                                         | 61.00%                                            |
| 99.80%                                    | 45503157                                         | 43.60%                                            |
| 99.90%                                    | 55293993                                         | 65.30%                                            |
| 100.00%                                   | 59659664                                         | 83.50%                                            |
| 100.00%                                   | 86263490                                         | 57.80%                                            |
| 100.00%                                   | 56422986                                         | 83.00%                                            |
| 100.00%                                   | 55542068                                         | 83.20%                                            |
| 99.80%                                    | 111774834                                        | 40.90%                                            |
| 100.00%                                   | 62725076                                         | 88.10%                                            |
| 100.00%                                   | 52439080                                         | 82.00%                                            |
| 100.00%                                   | 56220447                                         | 86.40%                                            |
| 100.00%                                   | 66453390                                         | 88.30%                                            |
| 100.00%                                   | 54425490                                         | 81.70%                                            |
| 100.00%                                   | 56034326                                         | 84.00%                                            |
| 100.00%                                   | 115626512                                        | 80.90%                                            |
| 100.00%                                   | 55196703                                         | 82.80%                                            |
| 100.00%                                   | 90197302                                         | 75.90%                                            |
| 100.00%                                   | 74595841                                         | 80.20%                                            |
| 100.00%                                   | 57010800                                         | 65.60%                                            |
| 100.00%                                   | 51666791                                         | 83.10%                                            |
| 100.00%                                   | 55355274                                         | 84.60%                                            |
| 100.00%                                   | 48829548                                         | 76.40%                                            |
| 100.00%                                   | 59573216                                         | 80.00%                                            |
| 100.00%                                   | 48082371                                         | 79.30%                                            |
| 100.00%                                   | 51919557                                         | 82.10%                                            |
| 100.00%                                   | 54342918                                         | 82.50%                                            |
| 100.00%                                   | 55393806                                         | 80.70%                                            |
| 100.00%                                   | 56937424                                         | 80.60%                                            |

|         |           |        |
|---------|-----------|--------|
| 100.00% | 54261428  | 83.10% |
| 100.00% | 90394531  | 78.50% |
| 100.00% | 71135567  | 74.90% |
| 100.00% | 52268137  | 75.80% |
| 100.00% | 54993338  | 76.20% |
| 100.00% | 52817742  | 76.90% |
| 100.00% | 64885970  | 66.70% |
| 100.00% | 58268213  | 81.20% |
| 100.00% | 56630049  | 81.60% |
| 97.80%  | 148111821 | 61.00% |
| 100.00% | 52455449  | 85.30% |
| 100.00% | 51005760  | 80.30% |
| 100.00% | 47549637  | 62.50% |
| 100.00% | 51979994  | 77.40% |
| 100.00% | 47377953  | 77.20% |
| 100.00% | 54955914  | 81.20% |
| 100.00% | 56655839  | 78.50% |
| 100.00% | 56805892  | 82.30% |
| 100.00% | 47213767  | 78.40% |
| 100.00% | 56767537  | 83.60% |
| 100.00% | 56372463  | 84.30% |
| 100.00% | 67291732  | 85.40% |
| 99.80%  | 60698755  | 60.70% |
| 99.80%  | 66145224  | 64.40% |
| 99.80%  | 73292368  | 68.00% |
| 100.00% | 76913901  | 70.50% |
| 100.00% | 54410781  | 83.30% |
| 100.00% | 46117390  | 73.90% |
| 100.00% | 50948113  | 73.70% |
| 100.00% | 86752827  | 84.30% |
| 99.80%  | 69025150  | 67.00% |
| 100.00% | 50849130  | 73.00% |
| 100.00% | 47563993  | 71.60% |
| 100.00% | 56541269  | 68.60% |

| Non_redundant_unique_reads_uniquely_mapped_to_human_genome | Non_redundant_unique_reads_out_of_non_redundant_reads |
|------------------------------------------------------------|-------------------------------------------------------|
|------------------------------------------------------------|-------------------------------------------------------|

|           |        |
|-----------|--------|
| 52494793  | 89.00% |
| 50985791  | 88.10% |
| 49293503  | 89.10% |
| 64413236  | 90.30% |
| 90107868  | 86.00% |
| 36893695  | 89.80% |
| 55640956  | 90.10% |
| 47346770  | 89.10% |
| 77614449  | 89.90% |
| 53320792  | 90.10% |
| 77351250  | 89.70% |
| 74037214  | 89.60% |
| 47517133  | 88.70% |
| 50552982  | 88.30% |
| 46892833  | 90.50% |
| 50471114  | 90.40% |
| 49337731  | 90.20% |
| 40393929  | 88.80% |
| 49986337  | 90.40% |
| 53549048  | 89.80% |
| 76956519  | 89.20% |
| 50313053  | 89.20% |
| 49540391  | 89.20% |
| 100944670 | 90.30% |
| 56483829  | 90.00% |
| 46974148  | 89.60% |
| 50309918  | 89.50% |
| 59830843  | 90.00% |
| 48534923  | 89.20% |
| 50047678  | 89.30% |
| 94594270  | 81.80% |
| 49616058  | 89.90% |
| 80609175  | 89.40% |
| 66265188  | 88.80% |
| 50911752  | 89.30% |
| 46094961  | 89.20% |
| 49497253  | 89.40% |
| 43301027  | 88.70% |
| 53510030  | 89.80% |
| 42919961  | 89.30% |
| 46482467  | 89.50% |
| 48654249  | 89.50% |
| 49405923  | 89.20% |
| 50331522  | 88.40% |

|           |        |
|-----------|--------|
| 48436497  | 89.30% |
| 80481847  | 89.00% |
| 63459530  | 89.20% |
| 46163311  | 88.30% |
| 48547479  | 88.30% |
| 46855564  | 88.70% |
| 57437212  | 88.50% |
| 51974105  | 89.20% |
| 50303206  | 88.80% |
| 131892657 | 89.00% |
| 46740014  | 89.10% |
| 45354869  | 88.90% |
| 42977803  | 90.40% |
| 46153662  | 88.80% |
| 42089573  | 88.80% |
| 48746166  | 88.70% |
| 50456906  | 89.10% |
| 50963607  | 89.70% |
| 42045470  | 89.10% |
| 50819835  | 89.50% |
| 50562732  | 89.70% |
| 60351115  | 89.70% |
| 53953116  | 88.90% |
| 59231881  | 89.50% |
| 64919145  | 88.60% |
| 68984433  | 89.70% |
| 48683466  | 89.50% |
| 41709590  | 90.40% |
| 45375896  | 89.10% |
| 78109467  | 90.00% |
| 62011784  | 89.80% |
| 45247240  | 89.00% |
| 42154562  | 88.60% |
| 50054713  | 88.50% |



| On_target_reads_reads_mapped_to_target_regions | On_target_reads_out_of_non_redundant_unique_reads | Coverage_of_target_regions_more_than_1X |
|------------------------------------------------|---------------------------------------------------|-----------------------------------------|
| 37199895                                       | 70.90%                                            | 93.70%                                  |
| 35511032                                       | 69.60%                                            | 94.10%                                  |
| 33568115                                       | 68.10%                                            | 94.70%                                  |
| 45194707                                       | 70.20%                                            | 94.20%                                  |
| 59425675                                       | 65.90%                                            | 97.60%                                  |
| 25731228                                       | 69.70%                                            | 94.10%                                  |
| 40388706                                       | 72.60%                                            | 94.50%                                  |
| 32600009                                       | 68.90%                                            | 94.40%                                  |
| 52314392                                       | 67.40%                                            | 94.50%                                  |
| 36136854                                       | 67.80%                                            | 94.70%                                  |
| 53585938                                       | 69.30%                                            | 94.30%                                  |
| 51826599                                       | 70.00%                                            | 94.30%                                  |
| 33160465                                       | 69.80%                                            | 94.50%                                  |
| 35367885                                       | 70.00%                                            | 94.40%                                  |
| 32006636                                       | 68.30%                                            | 94.40%                                  |
| 36408961                                       | 72.10%                                            | 93.70%                                  |
| 34450397                                       | 69.80%                                            | 94.20%                                  |
| 25640813                                       | 63.50%                                            | 94.60%                                  |
| 35536282                                       | 71.10%                                            | 93.80%                                  |
| 39838718                                       | 74.40%                                            | 93.80%                                  |
| 55376274                                       | 72.00%                                            | 94.60%                                  |
| 35157235                                       | 69.90%                                            | 94.60%                                  |
| 33716613                                       | 68.10%                                            | 94.60%                                  |
| 72072972                                       | 71.40%                                            | 95.40%                                  |
| 38939420                                       | 68.90%                                            | 94.90%                                  |
| 32687659                                       | 69.60%                                            | 94.30%                                  |
| 34027480                                       | 67.60%                                            | 94.90%                                  |
| 41466171                                       | 69.30%                                            | 95.00%                                  |
| 33624275                                       | 69.30%                                            | 94.40%                                  |
| 34669601                                       | 69.30%                                            | 94.40%                                  |
| 61262472                                       | 64.80%                                            | 97.60%                                  |
| 36576680                                       | 73.70%                                            | 93.80%                                  |
| 53767295                                       | 66.70%                                            | 95.20%                                  |
| 47013530                                       | 70.90%                                            | 95.00%                                  |
| 35042637                                       | 68.80%                                            | 94.10%                                  |
| 31827470                                       | 69.00%                                            | 94.30%                                  |
| 33817465                                       | 68.30%                                            | 94.50%                                  |
| 30241420                                       | 69.80%                                            | 94.50%                                  |
| 37665803                                       | 70.40%                                            | 94.50%                                  |
| 29032832                                       | 67.60%                                            | 94.80%                                  |
| 32114865                                       | 69.10%                                            | 94.60%                                  |
| 33744199                                       | 69.40%                                            | 94.40%                                  |
| 34474753                                       | 69.80%                                            | 94.70%                                  |
| 35033123                                       | 69.60%                                            | 94.90%                                  |

|          |        |        |
|----------|--------|--------|
| 33373283 | 68.90% | 94.60% |
| 55438623 | 68.90% | 95.10% |
| 44115659 | 69.50% | 94.10% |
| 30780094 | 66.70% | 95.00% |
| 34107321 | 70.30% | 94.60% |
| 31876178 | 68.00% | 94.70% |
| 40099907 | 69.80% | 94.70% |
| 34831867 | 67.00% | 94.70% |
| 34627876 | 68.80% | 94.60% |
| 95497833 | 72.40% | 97.80% |
| 31684332 | 67.80% | 94.50% |
| 31390535 | 69.20% | 94.30% |
| 30613838 | 71.20% | 93.90% |
| 30990271 | 67.10% | 94.80% |
| 30118220 | 71.60% | 94.00% |
| 33112214 | 67.90% | 94.60% |
| 33035836 | 65.50% | 95.00% |
| 35537586 | 69.70% | 94.40% |
| 29194220 | 69.40% | 94.10% |
| 37114963 | 73.00% | 93.90% |
| 35821160 | 70.80% | 94.10% |
| 41939328 | 69.50% | 94.60% |
| 34338754 | 63.60% | 94.80% |
| 39344056 | 66.40% | 94.40% |
| 42388855 | 65.30% | 94.70% |
| 50778466 | 73.60% | 94.60% |
| 34985081 | 71.90% | 94.40% |
| 28569972 | 68.50% | 94.60% |
| 32898431 | 72.50% | 94.40% |
| 57051860 | 73.00% | 94.60% |
| 42514381 | 68.60% | 94.90% |
| 30691984 | 67.80% | 94.10% |
| 30004029 | 71.20% | 93.70% |
| 37151771 | 74.20% | 94.30% |

| Number_of_on_target_genotypes_more_than_1X | Coverage_of_target_regions_more_than_10X |
|--------------------------------------------|------------------------------------------|
|--------------------------------------------|------------------------------------------|

|          |        |
|----------|--------|
| 58198378 | 83.90% |
| 58413120 | 84.90% |
| 58792872 | 86.00% |
| 58505981 | 88.30% |
| 60587563 | 91.70% |
| 58418725 | 82.90% |
| 58668633 | 87.20% |
| 58583939 | 85.00% |
| 58686853 | 88.40% |
| 58778533 | 87.70% |
| 58559587 | 88.80% |
| 58567749 | 88.80% |
| 58641503 | 85.80% |
| 58625976 | 85.90% |
| 58601592 | 85.10% |
| 58194066 | 86.90% |
| 58492663 | 86.20% |
| 58744210 | 83.30% |
| 58249831 | 86.90% |
| 58256969 | 85.60% |
| 58760103 | 89.00% |
| 58732834 | 86.60% |
| 58739602 | 86.00% |
| 59234020 | 91.90% |
| 58909865 | 87.40% |
| 58519214 | 85.00% |
| 58904569 | 86.70% |
| 58955347 | 87.50% |
| 58620139 | 86.50% |
| 58605537 | 86.00% |
| 60572499 | 92.60% |
| 58227825 | 85.40% |
| 59076695 | 89.10% |
| 58968028 | 89.30% |
| 58446590 | 85.70% |
| 58515954 | 84.70% |
| 58663173 | 86.10% |
| 58642622 | 86.40% |
| 58691213 | 87.00% |
| 58839935 | 84.50% |
| 58746433 | 85.80% |
| 58594201 | 86.00% |
| 58765828 | 87.10% |
| 58918881 | 87.30% |

|          |        |
|----------|--------|
| 58753045 | 86.00% |
| 59055136 | 89.80% |
| 58419000 | 87.20% |
| 59012015 | 85.60% |
| 58761357 | 86.20% |
| 58810588 | 85.60% |
| 58811244 | 87.60% |
| 58807862 | 85.90% |
| 58736130 | 86.20% |
| 60739184 | 94.70% |
| 58656961 | 85.20% |
| 58562734 | 85.10% |
| 58321714 | 85.90% |
| 58886058 | 84.80% |
| 58361200 | 84.40% |
| 58710989 | 85.40% |
| 58971278 | 86.20% |
| 58630592 | 86.50% |
| 58431128 | 84.90% |
| 58312074 | 85.90% |
| 58415332 | 86.20% |
| 58722461 | 87.50% |
| 58850959 | 86.70% |
| 58584520 | 86.70% |
| 58790884 | 87.30% |
| 58712432 | 88.70% |
| 58609894 | 85.70% |
| 58748097 | 84.90% |
| 58634698 | 87.10% |
| 58713018 | 88.80% |
| 58919725 | 88.40% |
| 58442553 | 82.70% |
| 58180252 | 82.50% |
| 58526066 | 87.90% |

| Number_of_on_target_genotypes_more_than_10X | Mean_depth_of_target_regions | Number_of_SNPs |
|---------------------------------------------|------------------------------|----------------|
| 52061681                                    | 47.1                         | 67055          |
| 52703299                                    | 44.9                         | 70909          |
| 53368582                                    | 43.4                         | 73319          |
| 54827338                                    | 59                           | 71346          |
| 56925801                                    | 77.9                         | 90457          |
| 51468425                                    | 33.6                         | 79632          |
| 54148389                                    | 52.3                         | 78017          |
| 52774095                                    | 42.1                         | 71657          |
| 54906530                                    | 67.1                         | 69194          |
| 54460204                                    | 47.4                         | 73204          |
| 55112637                                    | 68.9                         | 72483          |
| 55147605                                    | 66.7                         | 75002          |
| 53277630                                    | 42.7                         | 71793          |
| 53347417                                    | 45.3                         | 71276          |
| 52826315                                    | 42.1                         | 70166          |
| 53939564                                    | 47.5                         | 72804          |
| 53545811                                    | 45.2                         | 71591          |
| 51739782                                    | 33.3                         | 71030          |
| 53958549                                    | 46.5                         | 72716          |
| 53143538                                    | 51.3                         | 67274          |
| 55249168                                    | 71.2                         | 76284          |
| 53740596                                    | 45.3                         | 71756          |
| 53408516                                    | 43.6                         | 72619          |
| 57029153                                    | 93.8                         | 77913          |
| 54249074                                    | 51.2                         | 87164          |
| 52783396                                    | 42.3                         | 67522          |
| 53836101                                    | 44.8                         | 83655          |
| 54345688                                    | 54.5                         | 89498          |
| 53710150                                    | 43.3                         | 72555          |
| 53385200                                    | 44.8                         | 72053          |
| 57466609                                    | 80.8                         | 90825          |
| 53003054                                    | 46.9                         | 71532          |
| 55340813                                    | 68.3                         | 73982          |
| 55444978                                    | 60                           | 82059          |
| 53186979                                    | 45.6                         | 72199          |
| 52605303                                    | 41.2                         | 72086          |
| 53476868                                    | 43.8                         | 72840          |
| 53613701                                    | 38.9                         | 72522          |
| 54014596                                    | 48.8                         | 71484          |
| 52431359                                    | 37.9                         | 65435          |
| 53269418                                    | 41.8                         | 73532          |
| 53419634                                    | 43.9                         | 73528          |
| 54091652                                    | 44.2                         | 73079          |
| 54170210                                    | 44.9                         | 73727          |

|          |       |       |
|----------|-------|-------|
| 53423532 | 43    | 72851 |
| 55726405 | 71.5  | 76841 |
| 54136504 | 57.4  | 74019 |
| 53118680 | 39.6  | 71569 |
| 53504049 | 43.7  | 73627 |
| 53136276 | 41    | 71671 |
| 54390499 | 51.4  | 73890 |
| 53323601 | 44.8  | 72705 |
| 53507652 | 44.3  | 72712 |
| 58790009 | 126.9 | 83956 |
| 52873317 | 40.6  | 71085 |
| 52833652 | 40.2  | 72889 |
| 53343554 | 39.8  | 72484 |
| 52671202 | 40.1  | 72041 |
| 52427879 | 38.6  | 71676 |
| 53042383 | 42.8  | 72616 |
| 53497566 | 42.8  | 72730 |
| 53723497 | 46    | 67871 |
| 52689095 | 37.8  | 71959 |
| 53302732 | 47.8  | 71019 |
| 53541866 | 46.4  | 71978 |
| 54349328 | 54.2  | 74719 |
| 53847938 | 44.7  | 72102 |
| 53856624 | 50.5  | 71163 |
| 54225799 | 54.8  | 71978 |
| 55090401 | 65.2  | 75535 |
| 53177640 | 45.1  | 69234 |
| 52714915 | 36.9  | 66329 |
| 54087378 | 42.2  | 75138 |
| 55155683 | 73.8  | 75396 |
| 54892642 | 55    | 74907 |
| 51332080 | 39.5  | 71556 |
| 51210079 | 38.2  | 69921 |
| 54596727 | 47.8  | 74022 |

| Number_of_coding_SNPs | Number_of_synonymous_S<br>NPs | Number_of_nonsynonymous_S<br>NPs |
|-----------------------|-------------------------------|----------------------------------|
| 18696                 | 9643                          | 8576                             |
| 19738                 | 10132                         | 9112                             |
| 20169                 | 10367                         | 9266                             |
| 19183                 | 9854                          | 8861                             |
| 23967                 | 12527                         | 10848                            |
| 23237                 | 12035                         | 10630                            |
| 21601                 | 11290                         | 9799                             |
| 20089                 | 10296                         | 9278                             |
| 18560                 | 9510                          | 8536                             |
| 19866                 | 10186                         | 9165                             |
| 19363                 | 9969                          | 8914                             |
| 20032                 | 10330                         | 9207                             |
| 19771                 | 10186                         | 9071                             |
| 19600                 | 10108                         | 8979                             |
| 19200                 | 9889                          | 8810                             |
| 19664                 | 10263                         | 8930                             |
| 19537                 | 10140                         | 8928                             |
| 19836                 | 10183                         | 9169                             |
| 19619                 | 10075                         | 9046                             |
| 18605                 | 9522                          | 8624                             |
| 20136                 | 10448                         | 9213                             |
| 19672                 | 10148                         | 9016                             |
| 19967                 | 10249                         | 9213                             |
| 20020                 | 10478                         | 9057                             |
| 24476                 | 12779                         | 11103                            |
| 18739                 | 9730                          | 8518                             |
| 23758                 | 12271                         | 10907                            |
| 25066                 | 13020                         | 11436                            |
| 19975                 | 10345                         | 9143                             |
| 19892                 | 10231                         | 9127                             |
| 23882                 | 12376                         | 10883                            |
| 19861                 | 10268                         | 9059                             |
| 19682                 | 10284                         | 8917                             |
| 22617                 | 11659                         | 10368                            |
| 19776                 | 10224                         | 9049                             |
| 20002                 | 10296                         | 9186                             |
| 20002                 | 10300                         | 9190                             |
| 19994                 | 10345                         | 9122                             |
| 19597                 | 10090                         | 9001                             |
| 18188                 | 9332                          | 8378                             |
| 20444                 | 10531                         | 9393                             |
| 20205                 | 10409                         | 9266                             |
| 20179                 | 10331                         | 9349                             |
| 20237                 | 10517                         | 9189                             |

|       |       |      |
|-------|-------|------|
| 20241 | 10424 | 9264 |
| 20442 | 10646 | 9276 |
| 20167 | 10509 | 9162 |
| 19785 | 10210 | 9060 |
| 20297 | 10455 | 9310 |
| 19959 | 10304 | 9136 |
| 20085 | 10430 | 9155 |
| 20079 | 10340 | 9189 |
| 19891 | 10194 | 9173 |
| 20551 | 10733 | 9296 |
| 19655 | 10189 | 8974 |
| 20183 | 10374 | 9287 |
| 20089 | 10387 | 9213 |
| 19875 | 10209 | 9157 |
| 20112 | 10457 | 9187 |
| 19940 | 10347 | 9074 |
| 20040 | 10298 | 9201 |
| 18447 | 9576  | 8395 |
| 19901 | 10238 | 9146 |
| 19578 | 10105 | 8965 |
| 19805 | 10243 | 9066 |
| 20084 | 10425 | 9172 |
| 19559 | 10087 | 8953 |
| 19310 | 9924  | 8897 |
| 19394 | 10002 | 8886 |
| 20390 | 10522 | 9319 |
| 18939 | 9711  | 8736 |
| 18244 | 9292  | 8449 |
| 20817 | 10725 | 9547 |
| 20251 | 10410 | 9339 |
| 20187 | 10479 | 9217 |
| 20063 | 10283 | 9288 |
| 19888 | 10234 | 9160 |
| 20501 | 10530 | 9459 |



| Number_of_indels | Number_of_coding_indels |
|------------------|-------------------------|
|------------------|-------------------------|

|       |     |
|-------|-----|
| 6847  | 342 |
| 6928  | 348 |
| 7442  | 351 |
| 7885  | 377 |
| 9552  | 532 |
| 7937  | 434 |
| 8156  | 415 |
| 7142  | 365 |
| 7742  | 376 |
| 7942  | 371 |
| 7800  | 363 |
| 8081  | 364 |
| 7273  | 361 |
| 7114  | 386 |
| 7604  | 348 |
| 7753  | 351 |
| 7661  | 381 |
| 7498  | 353 |
| 7747  | 357 |
| 7085  | 351 |
| 7983  | 364 |
| 7373  | 367 |
| 7383  | 360 |
| 8801  | 407 |
| 8824  | 445 |
| 7189  | 344 |
| 8469  | 411 |
| 8958  | 445 |
| 7339  | 344 |
| 7333  | 365 |
| 10225 | 595 |
| 7071  | 369 |
| 7863  | 384 |
| 8222  | 423 |
| 7332  | 337 |
| 7336  | 368 |
| 7306  | 359 |
| 7348  | 382 |
| 7461  | 378 |
| 7034  | 343 |
| 7443  | 390 |
| 7476  | 373 |
| 7275  | 375 |
| 7347  | 375 |

|      |     |
|------|-----|
| 7243 | 377 |
| 7680 | 380 |
| 7375 | 358 |
| 7070 | 368 |
| 7148 | 379 |
| 7142 | 348 |
| 7479 | 361 |
| 7287 | 374 |
| 7241 | 370 |
| 9218 | 464 |
| 7046 | 365 |
| 7185 | 354 |
| 7505 | 370 |
| 7350 | 355 |
| 7005 | 355 |
| 7237 | 342 |
| 7323 | 361 |
| 7208 | 353 |
| 7266 | 367 |
| 7037 | 371 |
| 7329 | 361 |
| 7574 | 368 |
| 7666 | 361 |
| 7641 | 369 |
| 7711 | 355 |
| 7737 | 405 |
| 7255 | 350 |
| 7087 | 339 |
| 7735 | 402 |
| 7854 | 375 |
| 7888 | 370 |
| 7084 | 331 |
| 6744 | 326 |
| 7415 | 379 |
