# Supplementary material for: Integrative analysis of mutational and transcriptional profiles reveals driver mutations of metastatic breast cancers
Source: PubMed Central journal article supplement (PMC5004232; doi:10.1038/celldisc.2016.25), 2016-08-30
Supplement: celldisc201625-s8.pdf [file celldisc201625-s8.pdf]

**Supplementary Table 3. 53 HRM-specific mutations**

| Annotation | Mutation Type           | Nucleotide Number | cDNA mutation | Impact on Protein Synthesis |
|------------|-------------------------|-------------------|---------------|-----------------------------|
| ADPGK      | Non-synonymous SNV      | NM_031284         | C316T         | H106Y                       |
| ARMC2      | Non-synonymous SNV      | NM_032131         | C455A         | P152H                       |
| C11orf40   | Frameshift Deletion     | NM_144663         | 341_342del    | 114_114del                  |
| C3orf14    | Stop-gain SNV           | NM_020685         | C382T         | R128X                       |
| C6orf132   | Non-frameshift Deletion | NM_001164446      | 2922_2924del  | 974_975del                  |
| CDC27      | Stop-gain SNV           | NM_001114091      | C710A         | S237X                       |
| CELA3B     | Non-synonymous SNV      | NM_007352         | T800A         | I267K                       |
| CENPL      | Non-synonymous SNV      | NM_033319         | T484G         | F162V                       |
| CHTOP      | Non-synonymous SNV      | NM_015607         | C427G         | R143G                       |
| CLSPN      | Non-frameshift Deletion | NM_022111         | 3583_3585del  | 1195_1195del                |
| COL5A3     | Non-synonymous SNV      | NM_015719         | A4750C        | T1584P                      |
| CPOX       | Non-synonymous SNV      | NM_000097         | T1174G        | Y392D                       |
| DLL4       | Non-synonymous SNV      | NM_019074         | G1699T        | A567S                       |
| DYRK1B     | Non-synonymous SNV      | NM_004714         | A1823C        | D608A                       |
| EIF2C4     | Non-synonymous SNV      | NM_017629         | A1838C        | H613P                       |
| EMILIN3    | Non-synonymous SNV      | NM_052846         | T1952G        | V651G                       |
| FGFRL1     | Non-synonymous SNV      | NM_001004356      | T119G         | V40G                        |
| FRG2B      | Non-synonymous SNV      | NM_001080998      | G300C         | M100I                       |
| GOLGA6L10  | Non-synonymous SNV      | NM_001164465      | G1025A        | R342Q                       |
| HAX1       | Non-frameshift Deletion | NM_006118         | 119_121del    | 40_41del                    |
| HBP1       | Frameshift Insertion    | NM_012257         | 534_535ins    | H178fs                      |
| KDM6B      | Non-frameshift Deletion | NM_001080424      | 786_791del    | 262_264del                  |
| KLHL6      | Non-synonymous SNV      | NM_130446         | A1390C        | T464P                       |
| LIMK1      | Non-synonymous SNV      | NM_002314         | A1841C        | H614P                       |
| MUC6       | Non-synonymous SNV      | NM_005961         | A3211C        | T1071P                      |
| NUP93      | Stop-gain SNV           | NM_014669         | C43T          | Q15X                        |
| OR13A1     | Frameshift Insertion    | NM_001004297      | 805_806ins    | Y269fs                      |
| PCGF6      | Frameshift Deletion     | NM_001011663      | 68_69del      | 23_23del                    |
| PGM3       | Non-synonymous SNV      | NM_001199917      | G552T         | L184F                       |
| PKP2       | Non-synonymous SNV      | NM_001005242      | A2171C        | K724T                       |
| PKP3       | Non-synonymous SNV      | NM_007183         | G830C         | R277P                       |
| POTEH      | Non-synonymous SNV      | NM_001136213      | C324G         | C108W                       |
| PRAMEF10   | Non-synonymous SNV      | NM_001039361      | T503G         | F168C                       |
| PRAMEF11   | Non-synonymous SNV      | NM_001146344      | A646T         | I216F                       |
| PRAMEF11   | Stop-gain SNV           | NM_001146344      | T498A         | C166X                       |
| PRAMEF16   | Non-synonymous SNV      | NM_001045480      | A923G         | Q308R                       |
| PRB3       | Non-synonymous SNV      | NM_006249         | A703C         | K235Q                       |
| PRR25      | Non-synonymous SNV      | NM_001013638      | C720A         | H240Q                       |

|         |                          |              |              |               |
|---------|--------------------------|--------------|--------------|---------------|
| PSMD2   | Non-synonymous SNV       | NM_002808    | A515G        | E172G         |
| RTEL1   | Non-synonymous SNV       | NM_016434    | G901A        | A301T         |
| SATL1   | Stop-gain SNV            | NM_001012980 | C1803G       | Y601X         |
| SEPT8   | Non-synonymous SNV       | NM_001098812 | T1300G       | S434A         |
| SHROOM4 | Non-Frameshift Insertion | NM_020717    | 3392_3393ins | Q1131delinsQE |
| SLC18A3 | Non-synonymous SNV       | NM_003055    | A241C        | T81P          |
| SLC22A5 | Non-synonymous SNV       | NM_003060    | G259C        | A87P          |
| SRP14   | Non-frameshift Deletion  | NM_003134    | 321_323del   | 107_108del    |
| TAF4    | Non-synonymous SNV       | NM_003185    | A2385C       | K795N         |
| TAS1R2  | Non-synonymous SNV       | NM_152232    | A1885C       | T629P         |
| TAS2R30 | Non-synonymous SNV       | NM_001097643 | A521T        | H174L         |
| TIE1    | Non-synonymous SNV       | NM_005424    | T14G         | V5G           |
| WDR66   | Non-frameshift Deletion  | NM_144668    | 185_187del   | 62_63del      |
| ZNF295  | Non-frameshift Deletion  | NM_001098402 | 2649_2651del | 883_884del    |
| ZNF492  | Non-synonymous SNV       | NM_020855    | G118A        | A40T          |
