# Supplementary material for: Integrative analysis of mutational and transcriptional profiles reveals driver mutations of metastatic breast cancers
Source: PubMed Central journal article supplement (PMC5004232; doi:10.1038/celldisc.2016.25), 2016-08-30
Supplement: celldisc201625-s9.pdf [file celldisc201625-s9.pdf]

**Supplementary Table 4. HRM-specific TFs**

| <b>TF</b> | <b>p-value</b> |
|-----------|----------------|
| PAX5      | 0.000851       |
| FOS       | 0.004978       |
| SREBF1    | 0.000851       |
| MYB       | 0.000652       |
| TCF7      | 0.006019       |
| FLI1      | 0.000273       |
| SP1       | 0.009989       |
| IRF1      | 0.000301       |
| AKR1B1    | 0.002507       |
| ELK1      | 0.008377       |
| IRF8      | 0.006019       |
| JUN       | 0.000273       |
| USF2      | 0.000851       |
| CEBPA     | 3.38E-13       |
| SPI1      | 3.24E-17       |
| PPARG     | 1.40E-05       |
| IKZF1     | 0.000552       |
| E2F6      | 2.72E-06       |
| ETS1      | 3.39E-13       |
| POU2F2    | 7.19E-07       |
