# Supplementary material for: Integrative analysis of mutational and transcriptional profiles reveals driver mutations of metastatic breast cancers
Source: PubMed Central journal article supplement (PMC5004232; doi:10.1038/celldisc.2016.25), 2016-08-30
Supplement: celldisc201625-s10.pdf [file celldisc201625-s10.pdf]

**Supplementary Table 5. 13 mutant genes whose pathways were detected**

| Rank | Mutant gene | Target TF | Detected by mathematic model? |
|------|-------------|-----------|-------------------------------|
| 1    | ADPGK       | PAX5      |                               |
| 2    | SLC22A5     | PPARG     |                               |
| 3    | PCGF6       | E2F6      | Yes                           |
| 4    | DYRK1B      | SP1       |                               |
| 5    | NUP93       | E2F6      | Yes                           |
| 6    | PKP2        | FOS       | Yes                           |
| 7    | LIMK1       | PPARG     | Yes                           |
| 8    | TIE1        | FOS       | Yes                           |
| 9    | CDC27       | FOS       | Yes                           |
| 10   | DLL4        | SPI1      | Yes                           |
| 11   | HAX1        | SP1       |                               |
| 12   | SEPT8       | PPARG     |                               |
| 13   | KLHL6       | SP1       |                               |
