# Supplementary material for: Integrative analysis of mutational and transcriptional profiles reveals driver mutations of metastatic breast cancers
Source: PubMed Central journal article supplement (PMC5004232; doi:10.1038/celldisc.2016.25), 2016-08-30
Supplement: celldisc201625-s11.pdf [file celldisc201625-s11.pdf]

**Supplementary Table 6. HRM-specific pathways linking mutations to TFs**

For each mutation, the pathway shown here is the shortest pathway linking the mutation to associated TFs.

| <b>Mutation</b> | <b>TF</b> | <b>Pathway components</b>            |
|-----------------|-----------|--------------------------------------|
| LIMK1           | PPARG     | LIMK1, HSP90AA1, CAV1, PPARG         |
| HAX1            | SP1       | HAX1, ESR1, SP1                      |
| SEPT8           | PPARG     | SEPT8, SEPT5, STX4, PPARG            |
| ADPGK           | PAX5      | ADPGK, TADA3, TP53, CR2, PAX5        |
| DYRK1B          | SP1       | DYRK1B, CCND1, SP1                   |
| NUP93           | E2F6      | NUP93, RAE1, BUB1, CDK1, E2F1, E2F6  |
| KLHL6           | SP1       | KLHL6, PPP1R1B, CSNK2A1, SP1         |
| DLL4            | SPI1      | DLL4, NOTCH1, SPI1                   |
| PCGF6           | E2F6      | PCGF6, E2F6                          |
| CDC27           | FOS       | CDC27, SMAD3, FOS                    |
| SLC22A5         | PPARG     | SLC22A5, SLC9A3R1, EGFR, CAV1, PPARG |
| TIE1            | FOS       | TIE1, SMAD3, FOS                     |
| PKP2            | FOS       | PKP2, MARK3, MITF, FOS               |
